# Supplementary material for: Role of IL-17A rs2275913 and IL-17F rs763780 polymorphisms in risk of cancer development: an updated meta-analysis
Source: PubMed Central journal article supplement (PMC4740815; doi:10.1038/srep20439), 2016-02-04
Supplement: srep20439-s1.pdf [file srep20439-s1.pdf]

**Role of IL-17A rs2275913 and IL-17F rs763780 polymorphisms in risk of cancer  
development: an updated meta-analysis**

Zhi-Ming Dai, Tian-Song Zhang, Shuai Lin, Wang-Gang Zhang, Jie Liu, Xing-Mei  
Cao, Hong-Bao Li, Meng Wang, Xing-Han Liu, Kang Liu, Shan-Li Li, Zhi-Jun Dai

Supplementary Table S1. Re-sampling analysis of the associations between IL-17 rs2275913 polymorphism and cancer risk

| gene model              | OR (95% CI)      | <i>P</i> |
|-------------------------|------------------|----------|
| dominant model          | 1.24 (1.15-1.37) | <0.0001  |
| recessive model         | 1.40 (1.21-1.62) | <0.0001  |
| homozygote comparison   | 1.48 (1.28-1.73) | <0.0001  |
| heterozygote comparison | 1.16 (1.07-1.28) | 0.0008   |
| allelic model           | 1.23 (1.14-1.32) | <0.0001  |

Supplementary Table S2. Re-sampling analysis of the associations between IL-17 rs763780 polymorphism and

cancer risk

| gene model              | OR (95% CI)      | <i>P</i> |
|-------------------------|------------------|----------|
| dominant model          | 1.32 (1.12-1.70) | 0.003    |
| recessive model         | 1.61 (1.36-1.97) | <0.0001  |
| homozygote comparison*  | -                | -        |
| heterozygote comparison | 1.21 (1.04-1.46) | 0.02     |
| allelic model           | 1.36 (1.17-1.84) | 0.0007   |

\*Data does not apply to the model, and the relevant statistics cannot be calculated without reporting

Supplementary Table S3. The associations between IL-17 polymorphisms and other cancers included in the meta-analysis

| Cancer type | No. of studies | Author   | Year | Ethnicity | Case/control | Polymorphism site   | Cancer risk   |
|-------------|----------------|----------|------|-----------|--------------|---------------------|---------------|
| CRC         | 2              | Nemati   | 2015 | Caucasian | 202/203      | rs2275913, rs763780 | yes           |
|             |                | Omrane   | 2014 | Caucasian | 102/139      | rs2275913, rs763780 | yes           |
| CC          | 2              | Lv       | 2015 | Asian     | 264/264      | rs2275913, rs763780 | rs2275913 yes |
|             |                | Quan     | 2012 | Asian     | 311/463      | rs2275913, rs763780 | rs2275913 yes |
| HCC         | 2              | Xi       | 2015 | Asian     | 155/171      | rs2275913, rs763780 | no risk       |
|             |                | Li       | 2014 | Asian     | 395/174      | rs2275913           | yes           |
| PTC         | 1              | Lee      | 2015 | Asian     | 94/260       | rs2275913           | no risk       |
| AML         | 1              | Wrobel   | 2014 | Caucasian | 62/125       | rs2275913, rs763780 | rs763780 yes  |
| EC          | 1              | Yin      | 2014 | Asian     | 380/380      | rs2275913           | yes           |
| LC          | 1              | Kaabachi | 2014 | Caucasian | 239/258      | rs2275913, rs763780 | rs763780 yes  |
| BLC         | 1              | Zhou     | 2013 | Asian     | 301/446      | rs2275913, rs763780 | yes           |
| BC          | 1              | Wang     | 2012 | Asian     | 491/502      | rs2275913, rs763780 | rs2275913 yes |
| OC          | 1              | Ruan     | 2012 | Asian     | 92/38        | rs2275913, rs763780 | no risk       |

CRC: colorectal cancer; CC: cervical cancer; PTC: papillary thyroid cancer; HCC: hepatocellular carcinoma; LC: lung cancer; AML: acute myeloid leukemia; EC: esophageal cancer; BLC: bladder cancer; BC: breast cancer; OC: ovarian cancer.
